# Supplementary material for: Self-produced bubble-template synthesis of La2O3:Yb/Er@Au hollow spheres with markedly enhanced luminescence and release properties
Source: Royal Society of Chemistry journal article supplement (doi:10.1039/c4ce01063a), 2014-01-01
Supplement: c4ce01063a1.pdf [file c4ce01063a1.pdf]

## Electronic Supporting Information

### Self-produced bubble-template synthesis of $\text{La}_2\text{O}_3\text{:Yb/Er@Au}$ hollow spheres with markedly enhanced luminescence and release properties

Ruichan Lv, Guixin Yang, Yunlu Dai, Shili Gai, Fei He, and Piaoping Yang\*

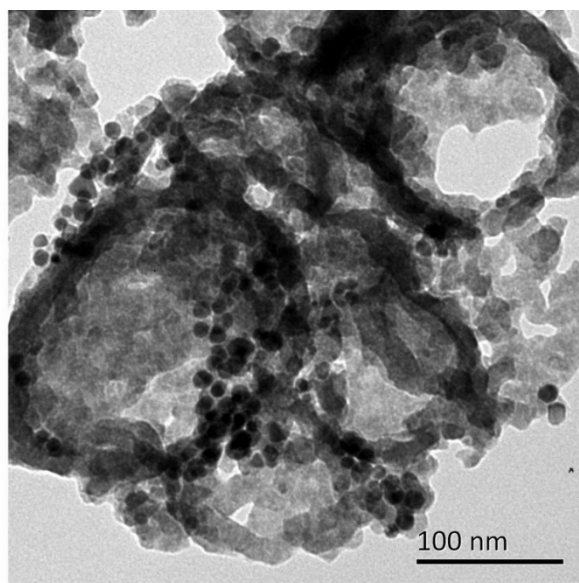

**Fig. S1** SEM image of  $\text{La}_2\text{O}_3\text{:Yb/Er@Au}$  HMSs dissolved by HCl.

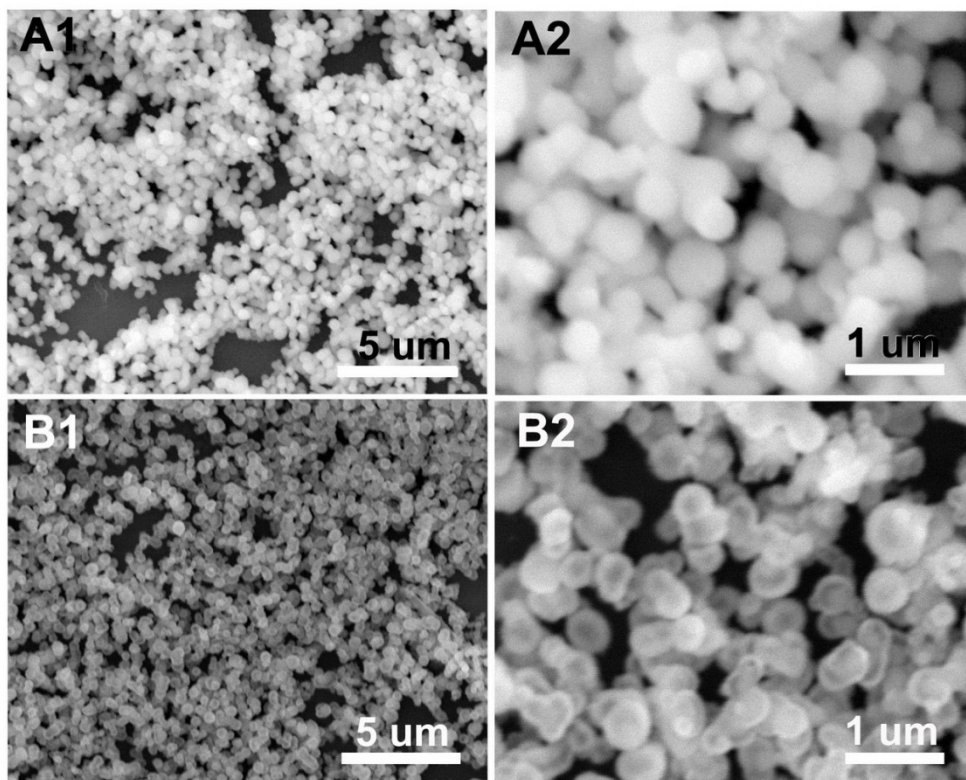

**Fig. S2** SEM images of  $\text{La}(\text{OH})_3:\text{Yb}/\text{Er}$  prepared at temperatures of 70 °C (A1 and A2), and 90 °C (B1 and B2) with 1 mmol  $\text{H}_3\text{Cit}$  and 2.4 g of  $\text{NaOH}$ .

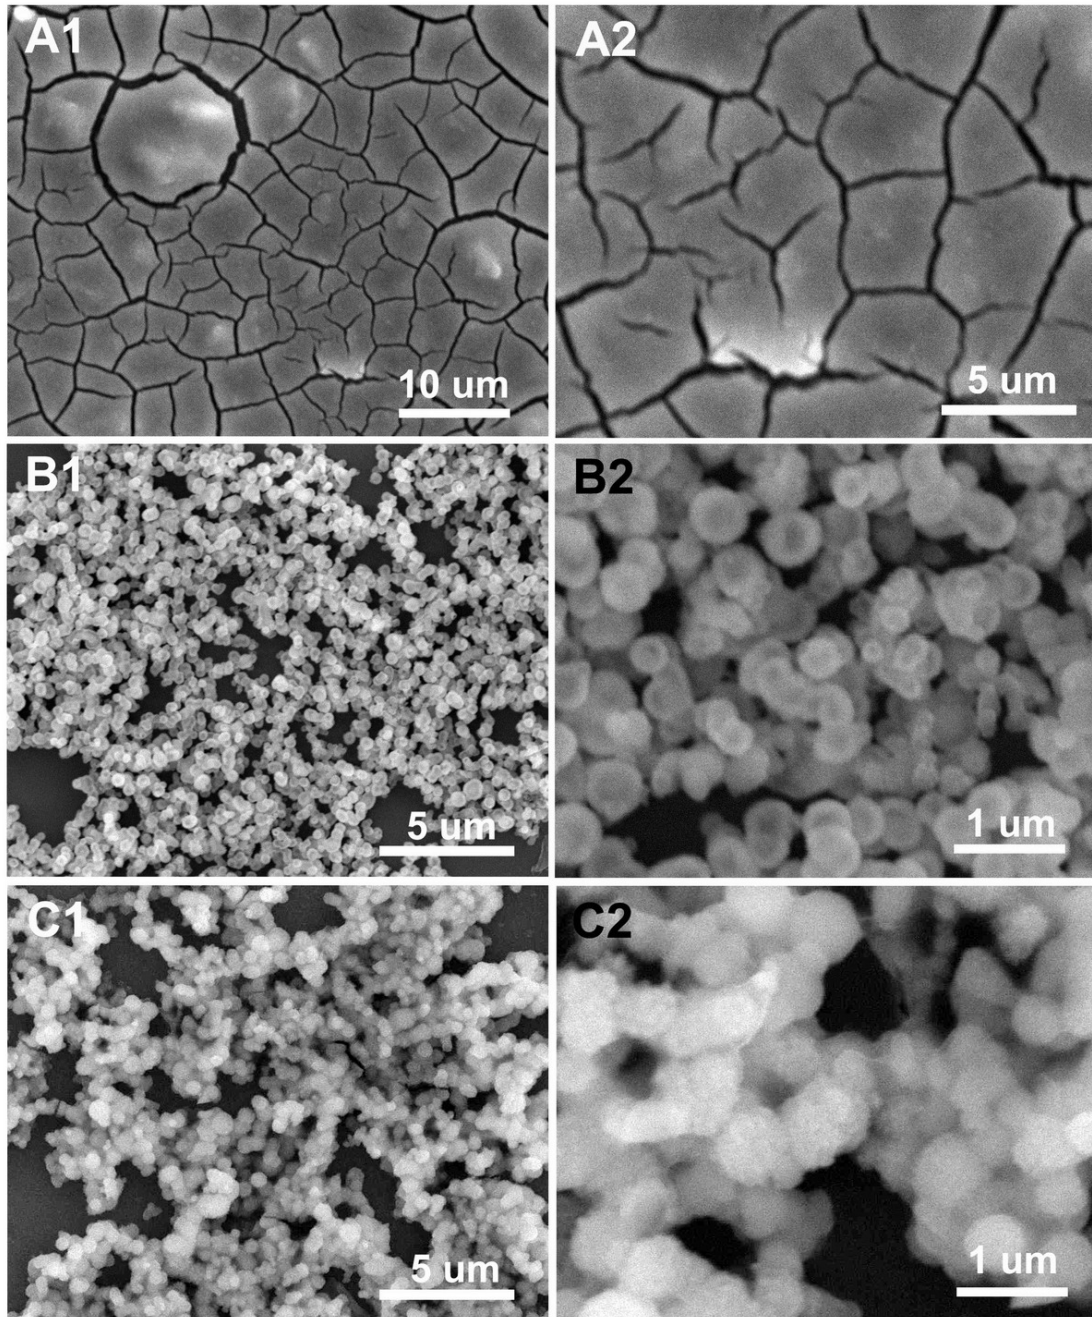

**Fig. S3** SEM images of  $\text{La}(\text{OH})_3:\text{Yb}/\text{Er}$  prepared with  $\text{H}_3\text{Cit}$  amount of 0 mmol (A1 and A2), 1 mmol (B1 and B2), and 2 mmol (C1 and C2) at 90 °C with 2.4 g of NaOH.

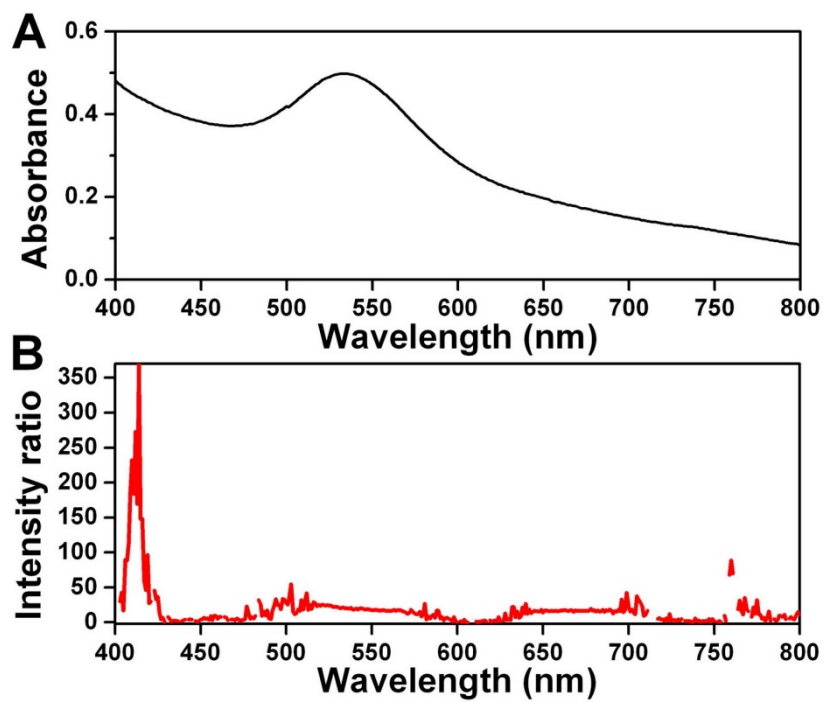

**Fig. S4** UV-vis spectra of ANs (A) and the intensity ratio (B) between the AHMSs and LHMSs

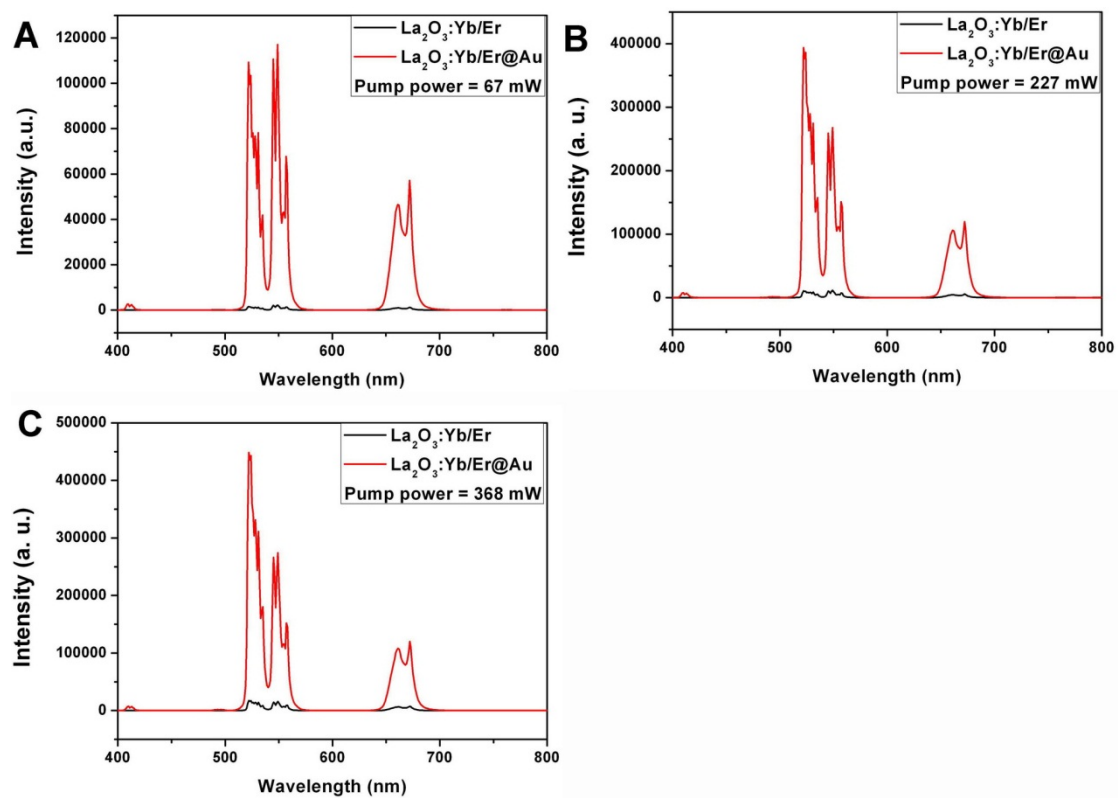

**Fig. S5** The UC emission spectra of LHMSs and AHMSs under the pump power of 67 mW (A), 227 mW (B), and 368 mW.

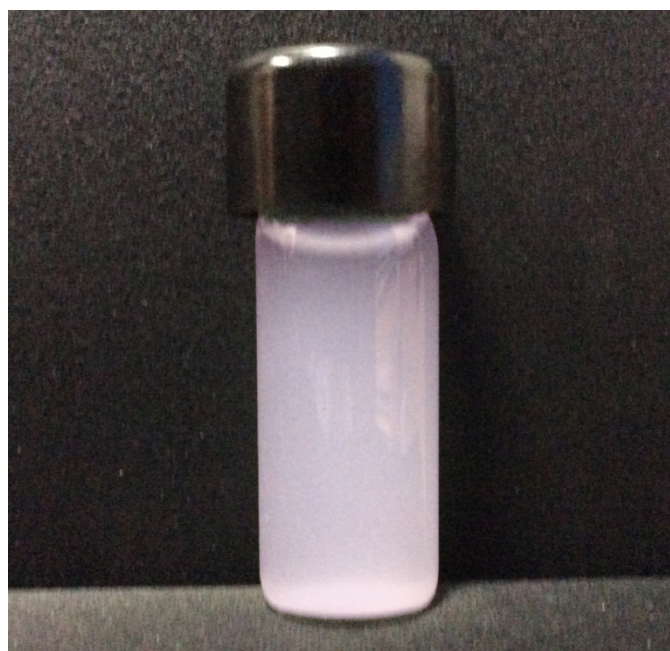

**Fig. S6** The photograph of the  $\text{La}_2\text{O}_3:\text{Yb/Er@Au}$  sample dispersed in the deionized water under the daylight.
